# Supplementary material for: Palladium-catalyzed ortho-acyloxylation of N-nitrosoanilines via direct sp2 C–H bond activation
Source: Royal Society of Chemistry journal article supplement (doi:10.1039/c5ob00691k), 2015-01-01

## Supporting Information

### Palladium-catalyzed *ortho*-acyloxylation of *N*-nitrosoanilines via direct $sp^2$ C–H bond activation

Dan-Dan Li,<sup>a</sup> Yi-Xuan Cao<sup>a</sup> and Guan-Wu Wang<sup>\*a,b</sup>

<sup>a</sup> Hefei National Laboratory for Physical Sciences at Microscale, iChEM  
(Collaborative Innovation Center of Chemistry for Energy Materials), and  
Department of Chemistry, University of Science and Technology of China, Hefei,  
Anhui 230026, P. R. China

<sup>b</sup> State Key Laboratory of Applied Organic Chemistry, Lanzhou University,  
Lanzhou, Gansu 730000, P. R. China

[gwang@ustc.edu.cn](mailto:gwang@ustc.edu.cn)

### Table of Contents

|                                                                                                                         |        |
|-------------------------------------------------------------------------------------------------------------------------|--------|
| <sup>1</sup> H NMR and <sup>13</sup> C NMR spectra of compounds <b>1d</b> and <b>1l</b> .....                           | S2-S3  |
| <sup>1</sup> H NMR and <sup>13</sup> C NMR spectra of compounds <b>2a–p</b> , <b>3a</b> , <b>3b</b> and <b>3g</b> ..... | S4-S22 |

# <sup>1</sup>H NMR and <sup>13</sup>C NMR spectra of compounds 1d and 1l

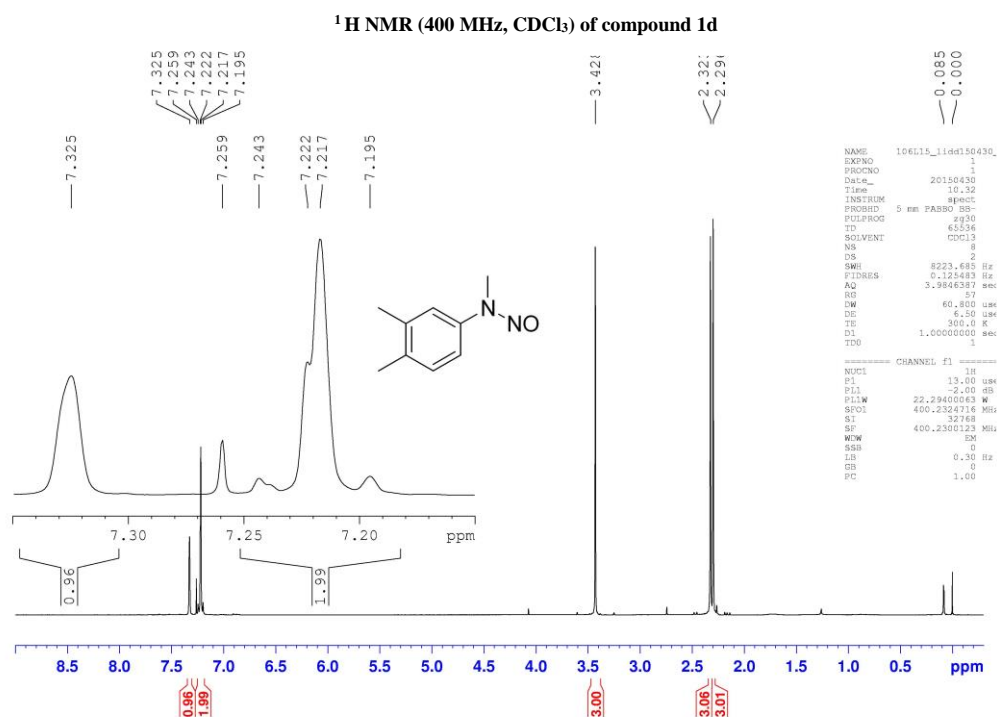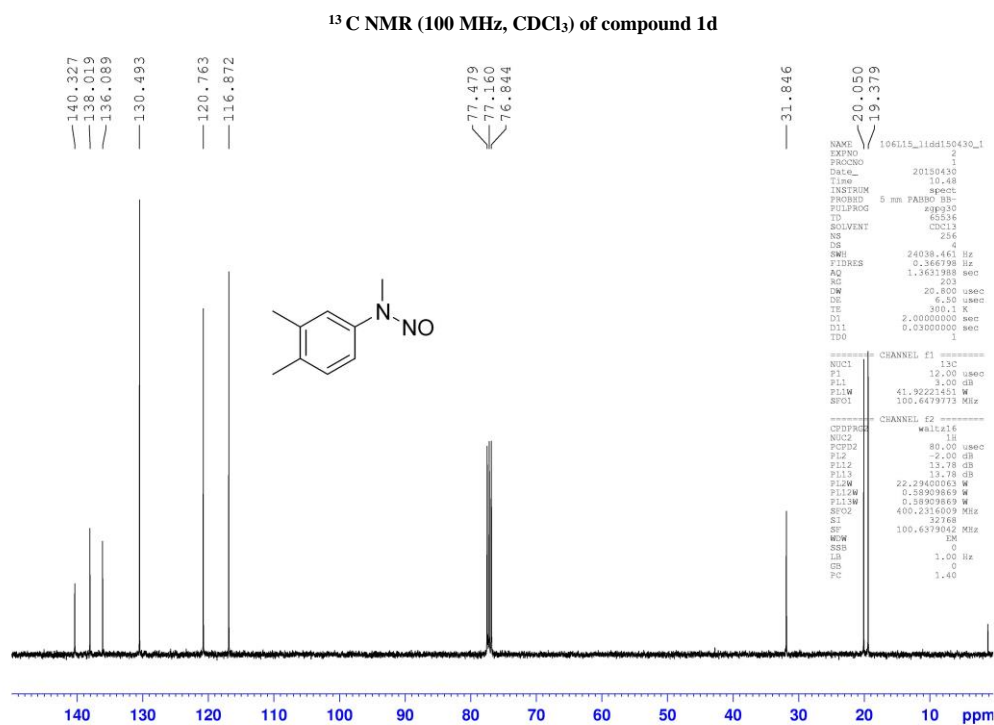

<sup>1</sup>H NMR (400 MHz, CDCl<sub>3</sub>) of compound 11

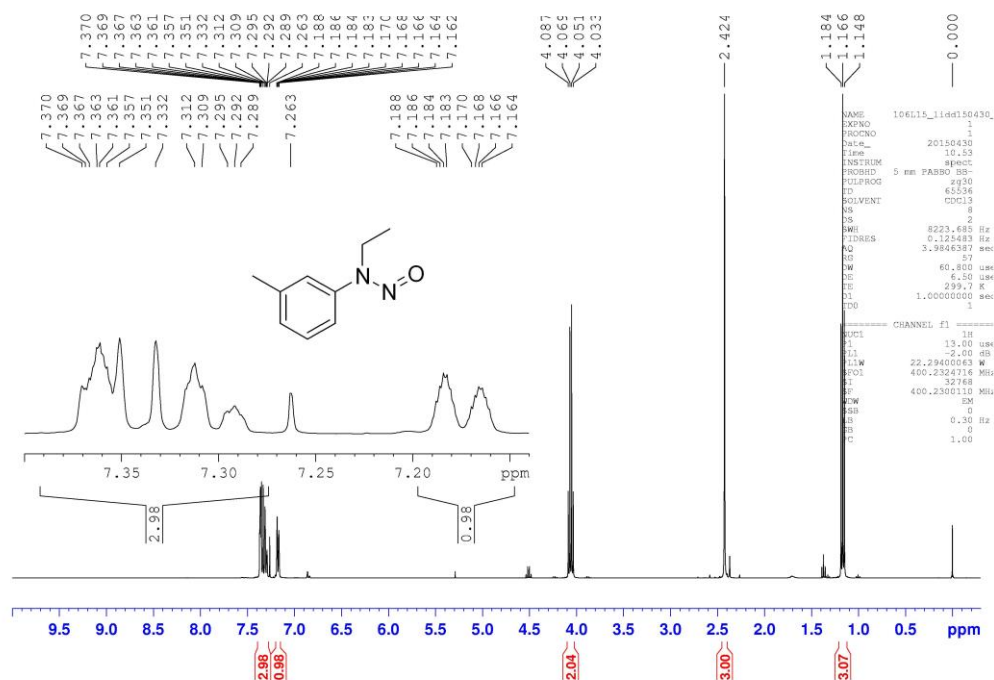

<sup>13</sup>C NMR (100 MHz, CDCl<sub>3</sub>) of compound 11

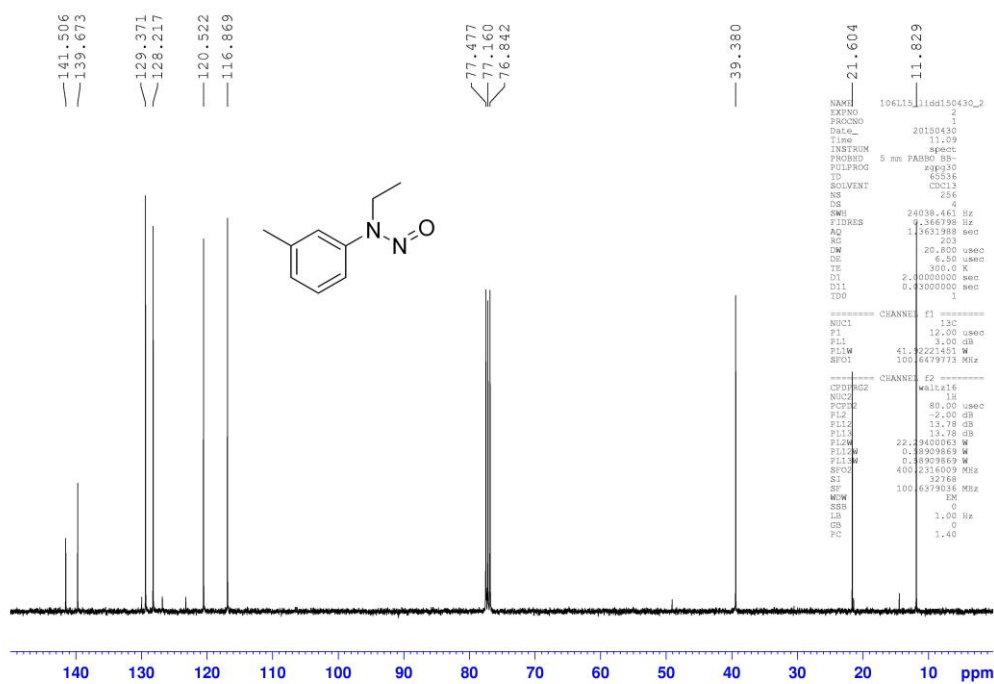

# <sup>1</sup>H NMR and <sup>13</sup>C NMR spectra of compounds 2a–p, 3a, 3b and 3g

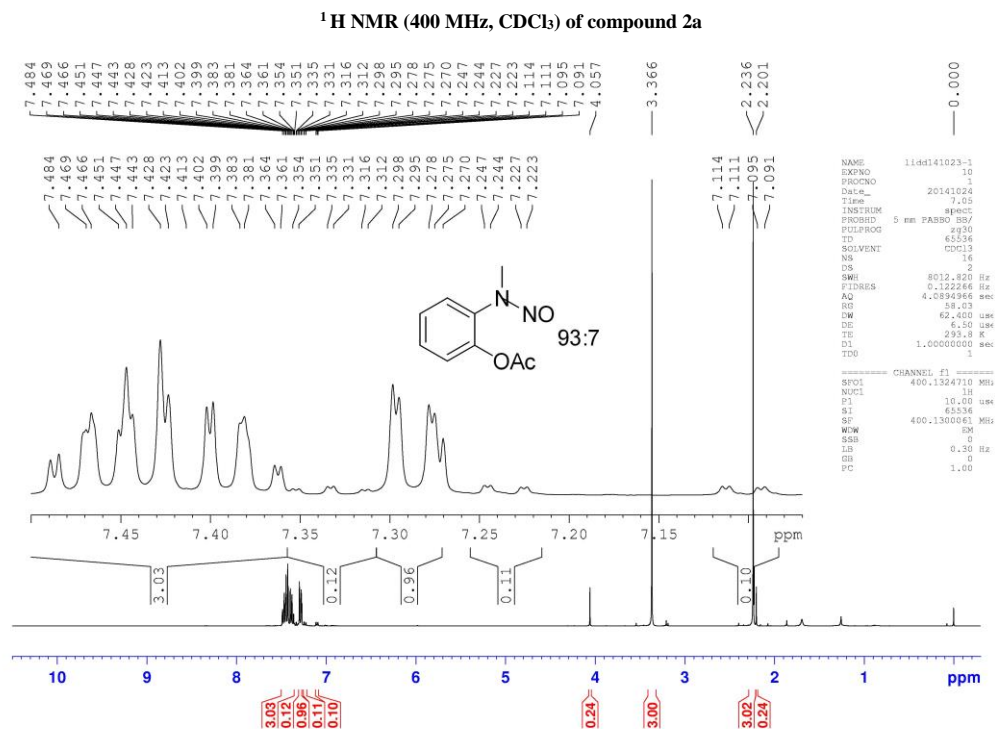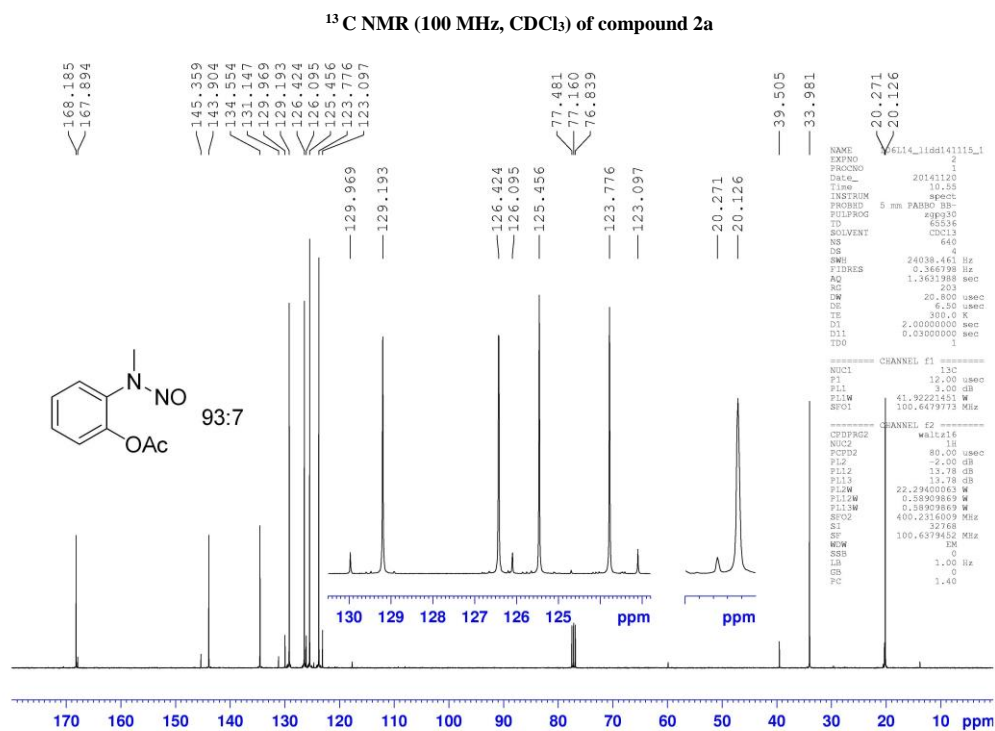

<sup>1</sup>H NMR (400 MHz, CDCl<sub>3</sub>) of compound 2b

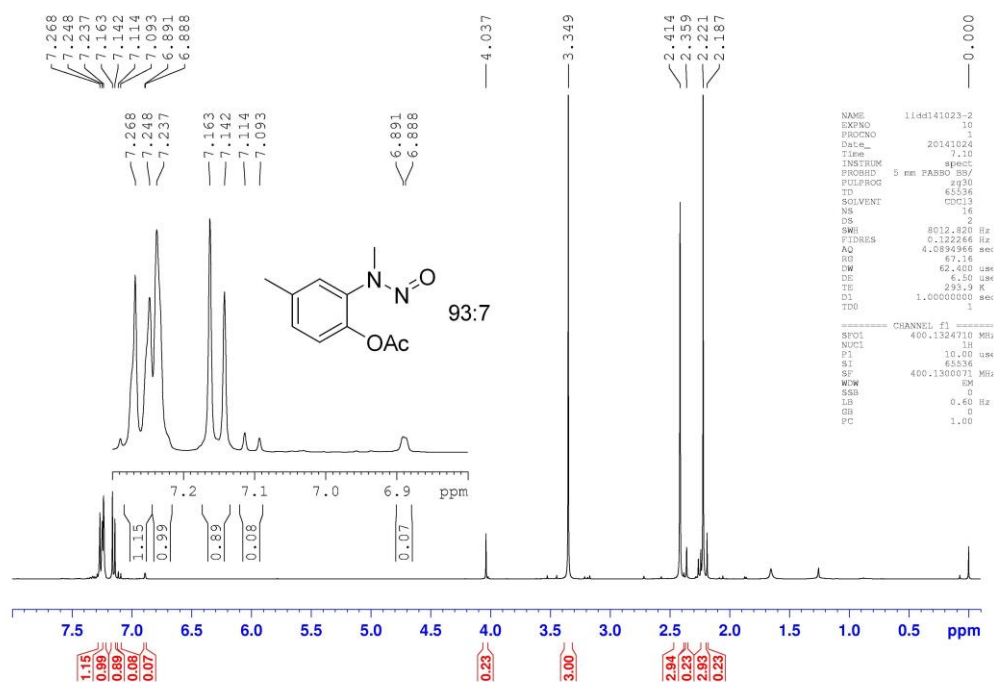

<sup>13</sup>C NMR (100 MHz, CDCl<sub>3</sub>) of compound 2b

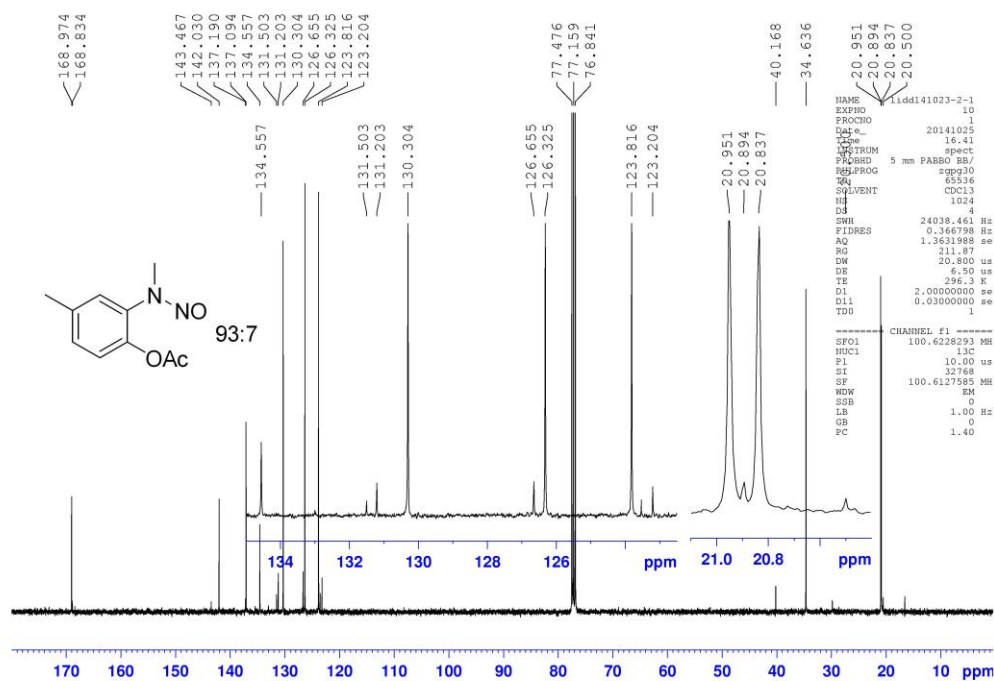

<sup>1</sup>H NMR (400 MHz, CDCl<sub>3</sub>) of compound 2c

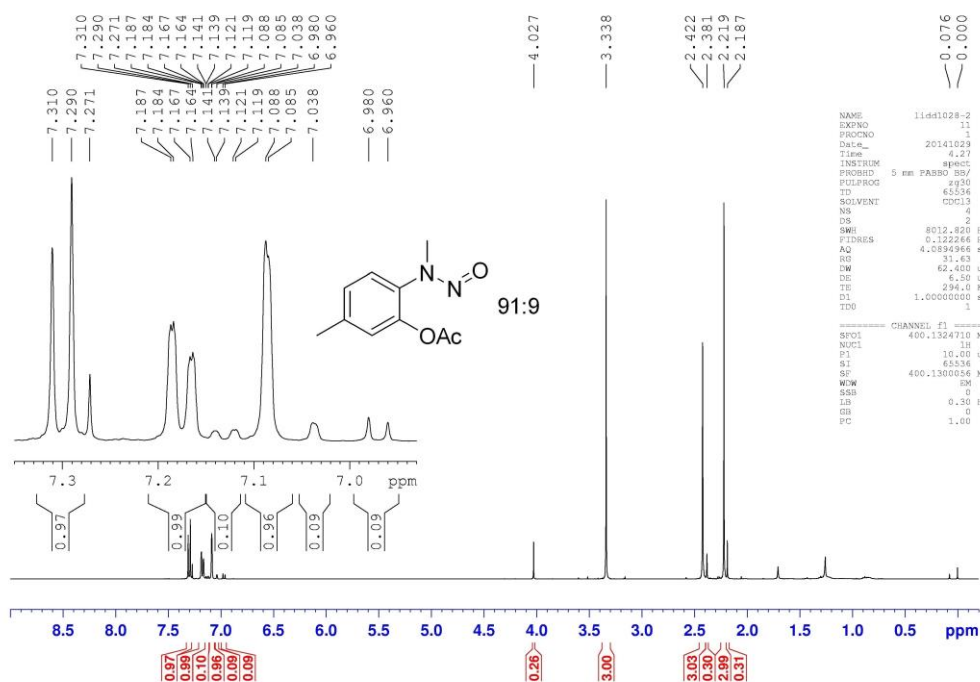

<sup>13</sup>C NMR (100 MHz, CDCl<sub>3</sub>) of compound 2c

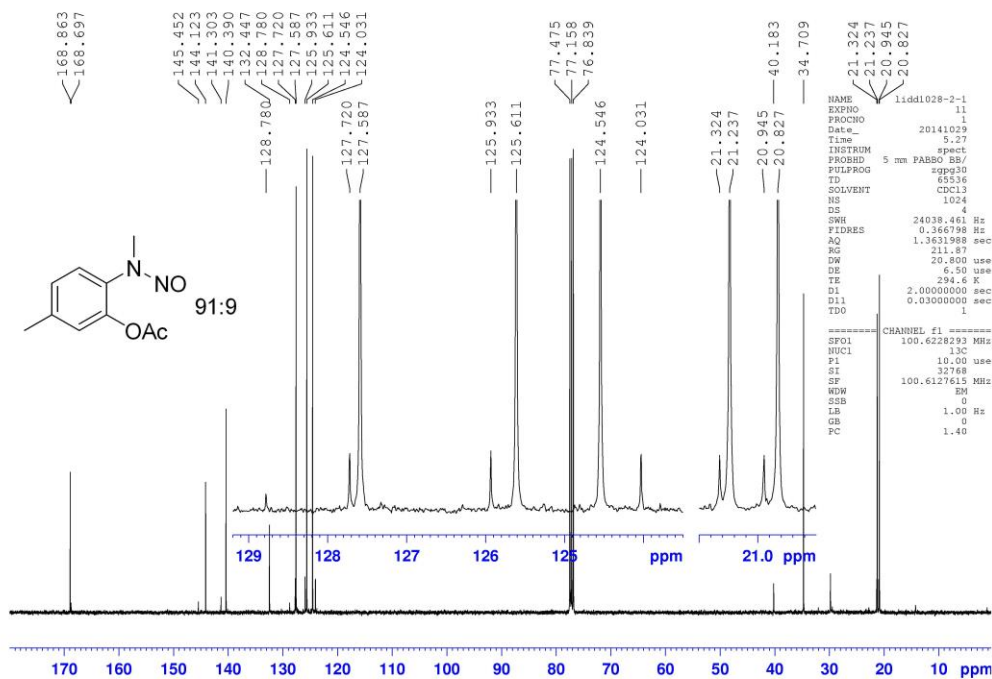

<sup>1</sup>H NMR (400 MHz, CDCl<sub>3</sub>) of compound 2d

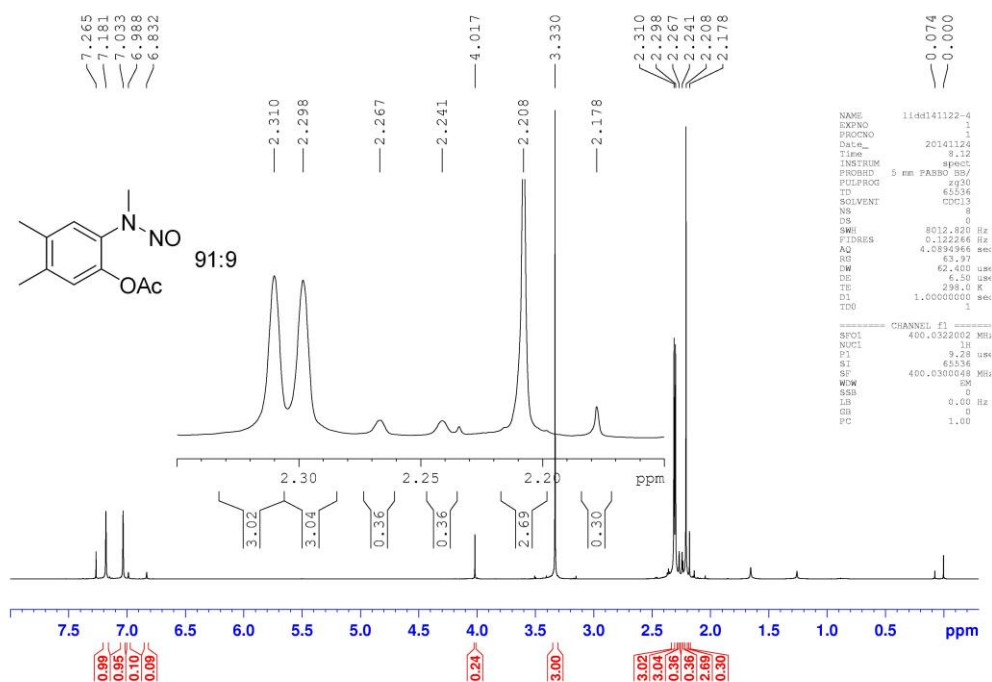

<sup>13</sup>C NMR (100 MHz, CDCl<sub>3</sub>) of compound 2d

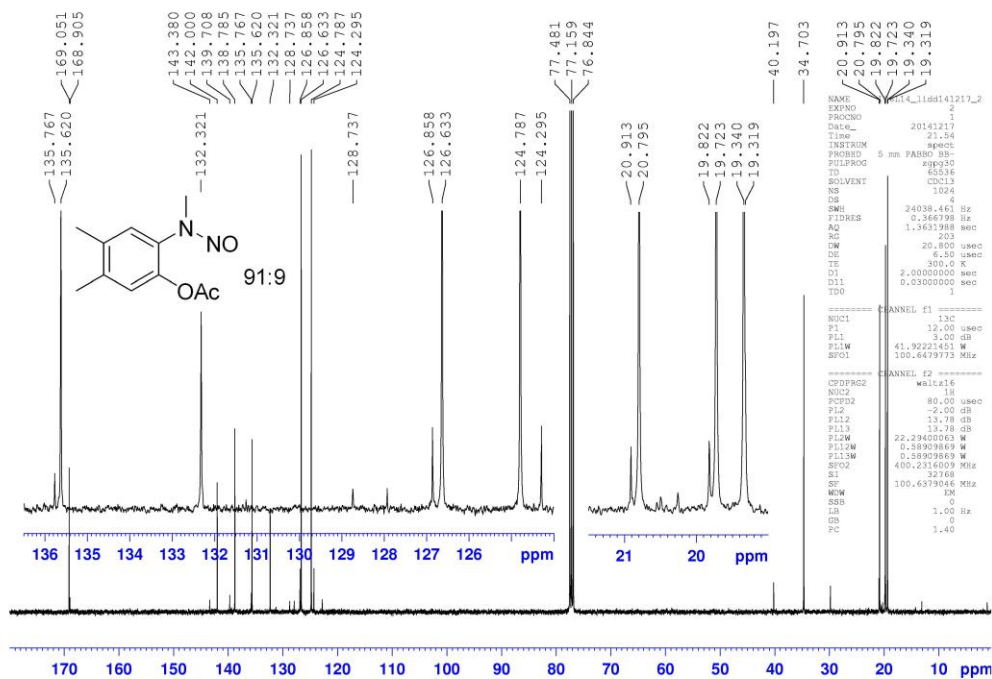

<sup>1</sup>H NMR (400 MHz, CDCl<sub>3</sub>) of compound 2e

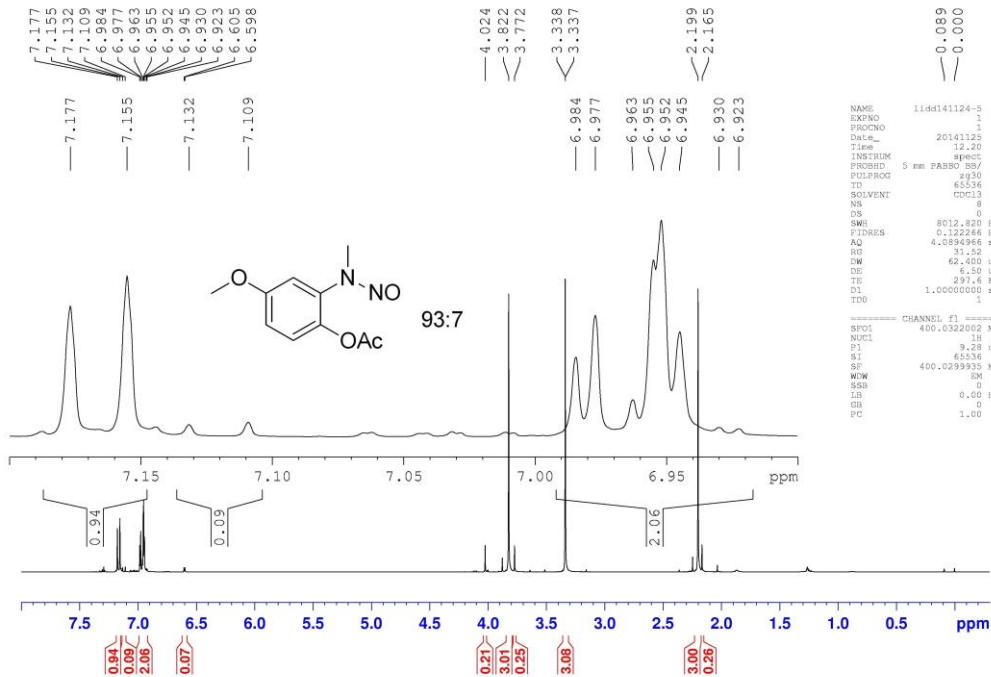

<sup>13</sup>C NMR (100 MHz, CDCl<sub>3</sub>) of compound 2e

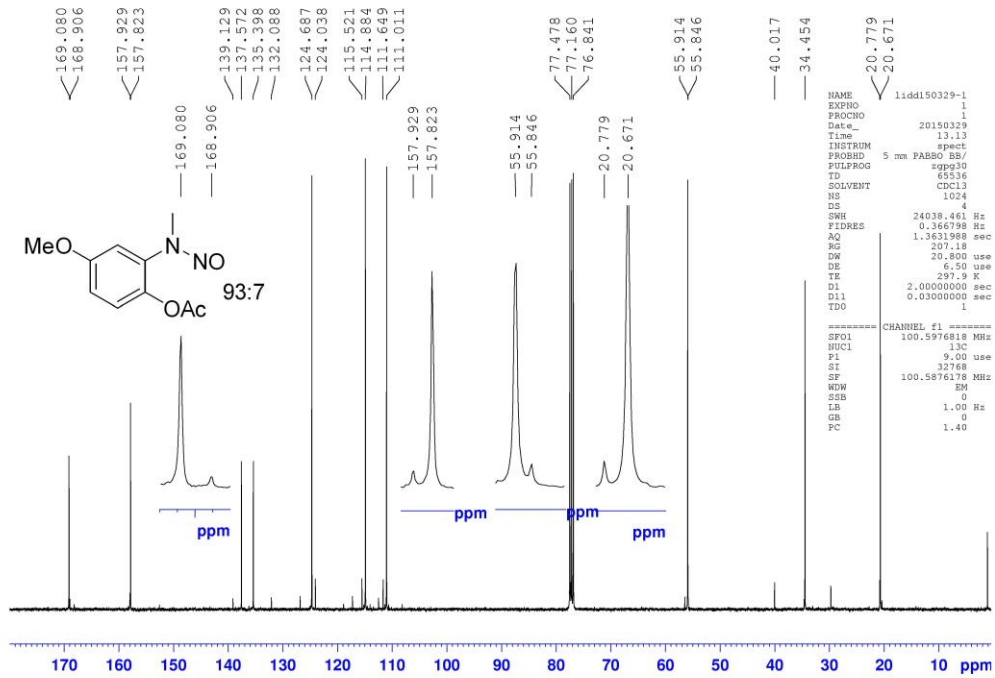



<sup>1</sup>H NMR (400 MHz, CDCl<sub>3</sub>) of compound 2f

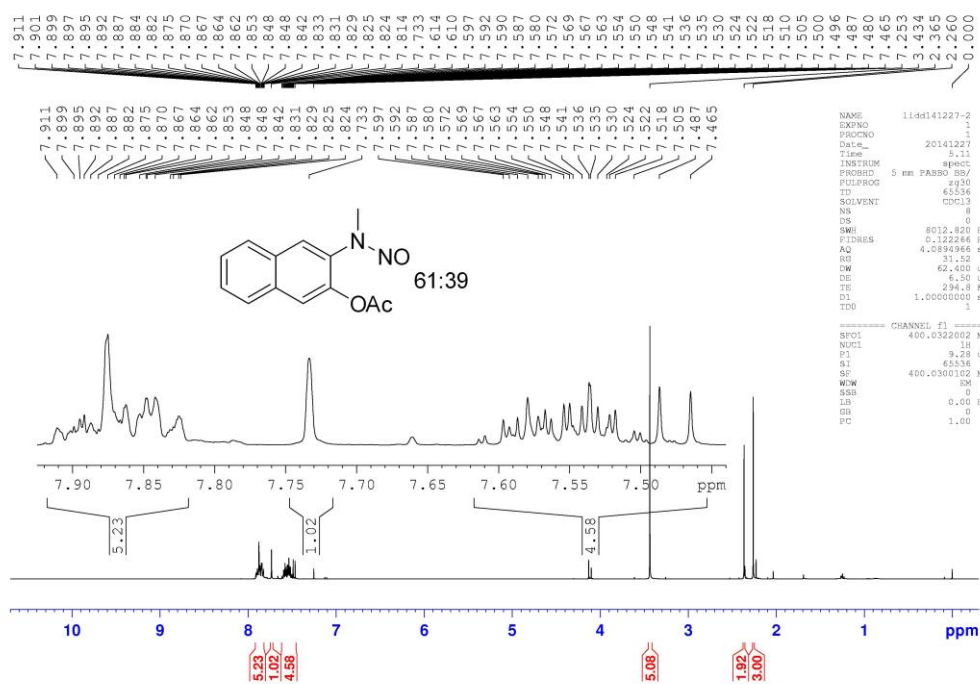

<sup>13</sup>C NMR (100 MHz, CDCl<sub>3</sub>) of compound 2f

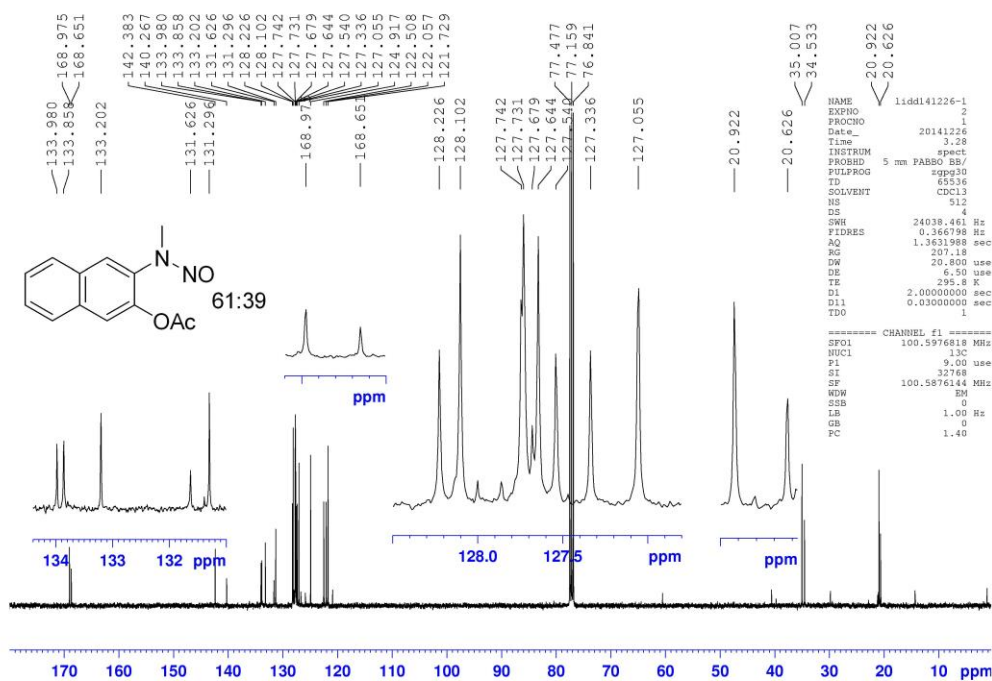

<sup>1</sup>H NMR (400 MHz, CDCl<sub>3</sub>) of compound 2g

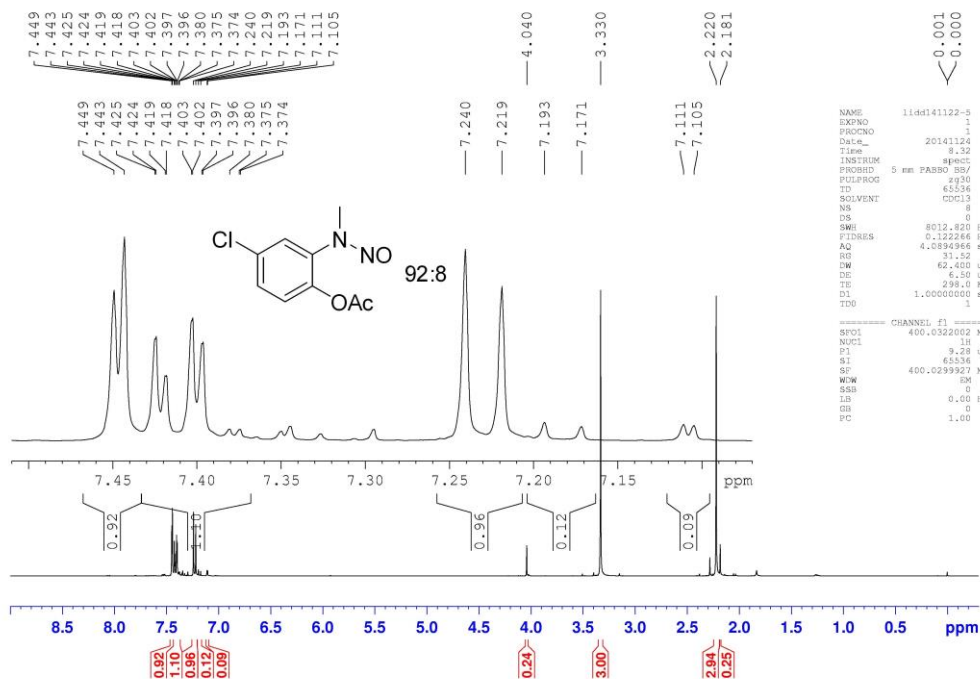

<sup>13</sup>C NMR (100 MHz, CDCl<sub>3</sub>) of compound 2g

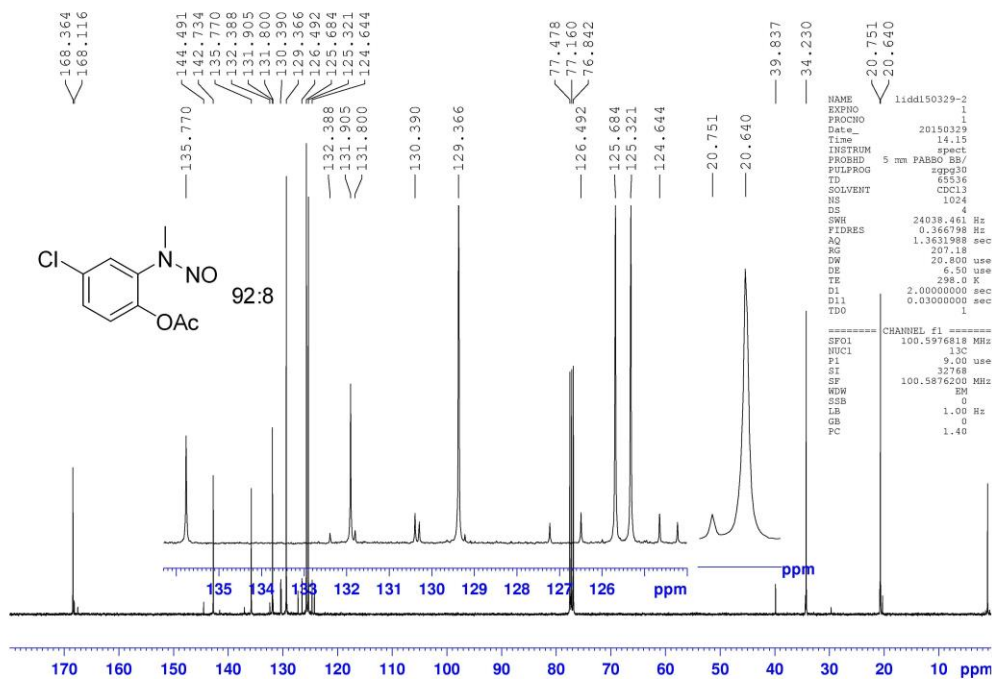

<sup>1</sup>H NMR (400 MHz, CDCl<sub>3</sub>) of compound 2h

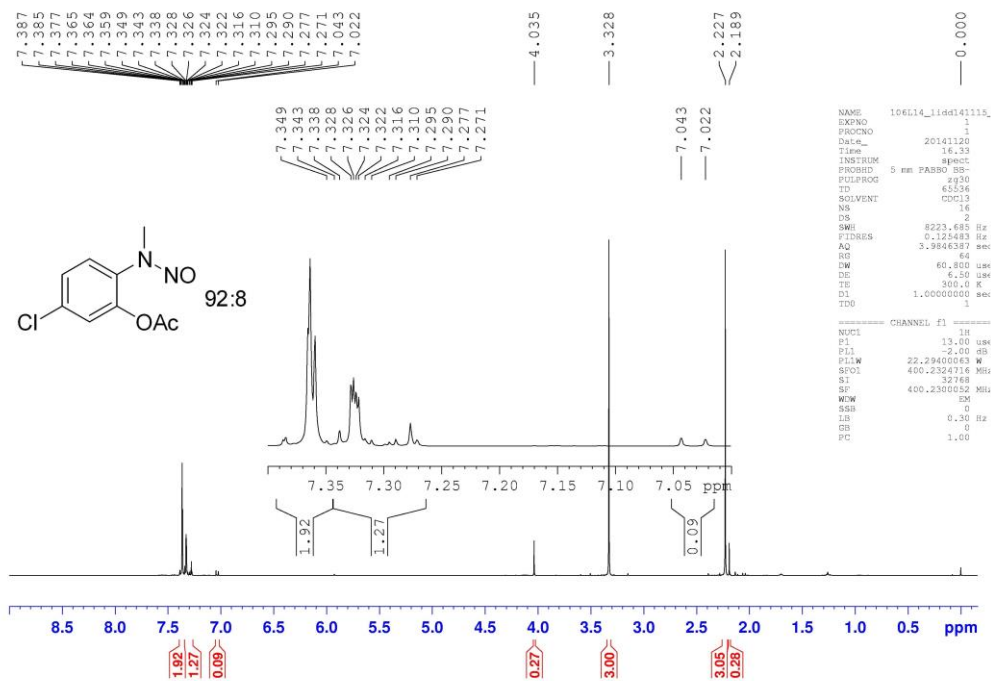

<sup>13</sup>C NMR (100 MHz, CDCl<sub>3</sub>) of compound 2h

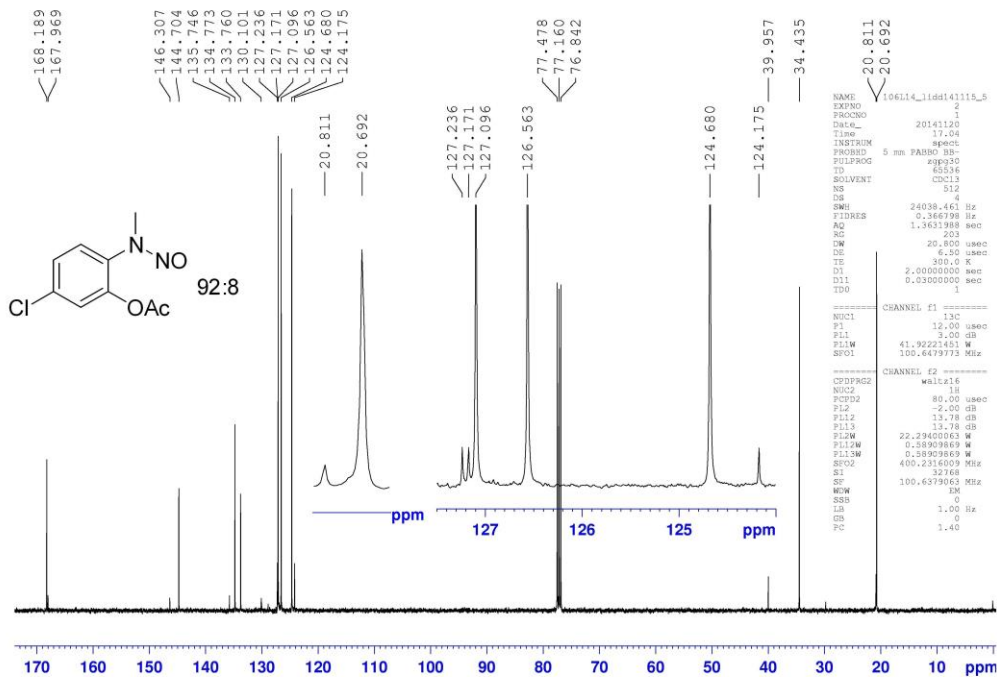

<sup>1</sup>H NMR (400 MHz, CDCl<sub>3</sub>) of compound 2i

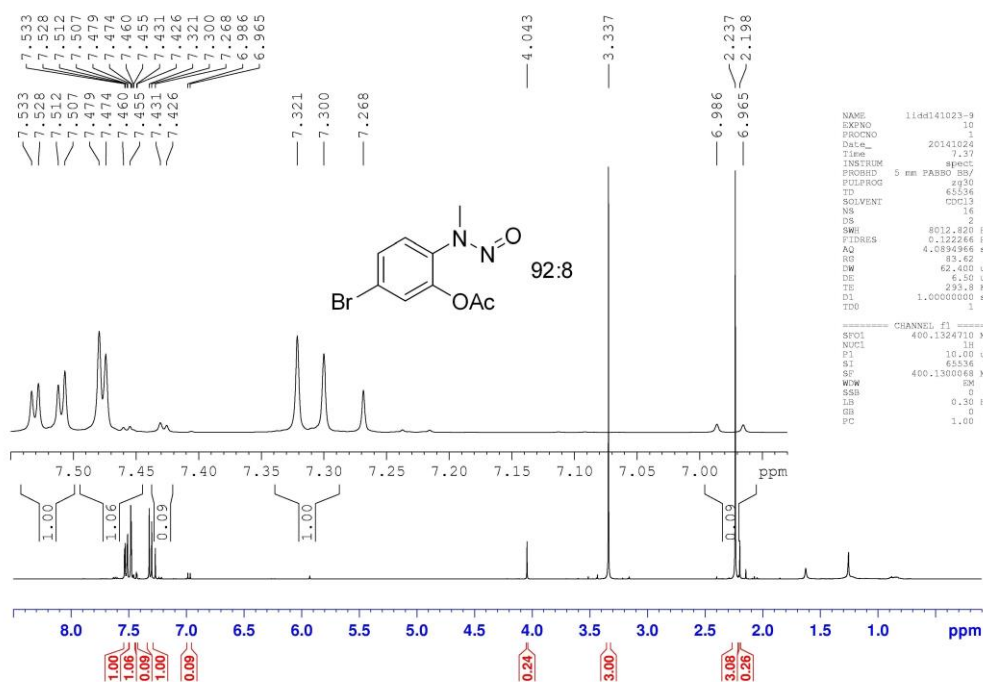

<sup>13</sup>C NMR (100 MHz, CDCl<sub>3</sub>) of compound 2i

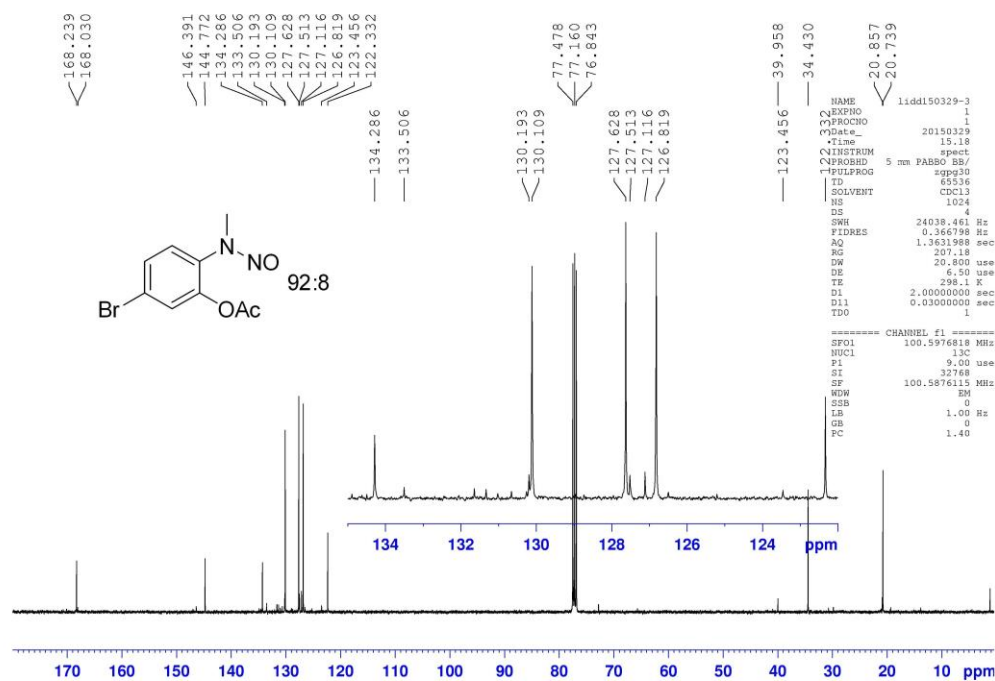

<sup>1</sup>H NMR (400 MHz, CDCl<sub>3</sub>) of compound 2j

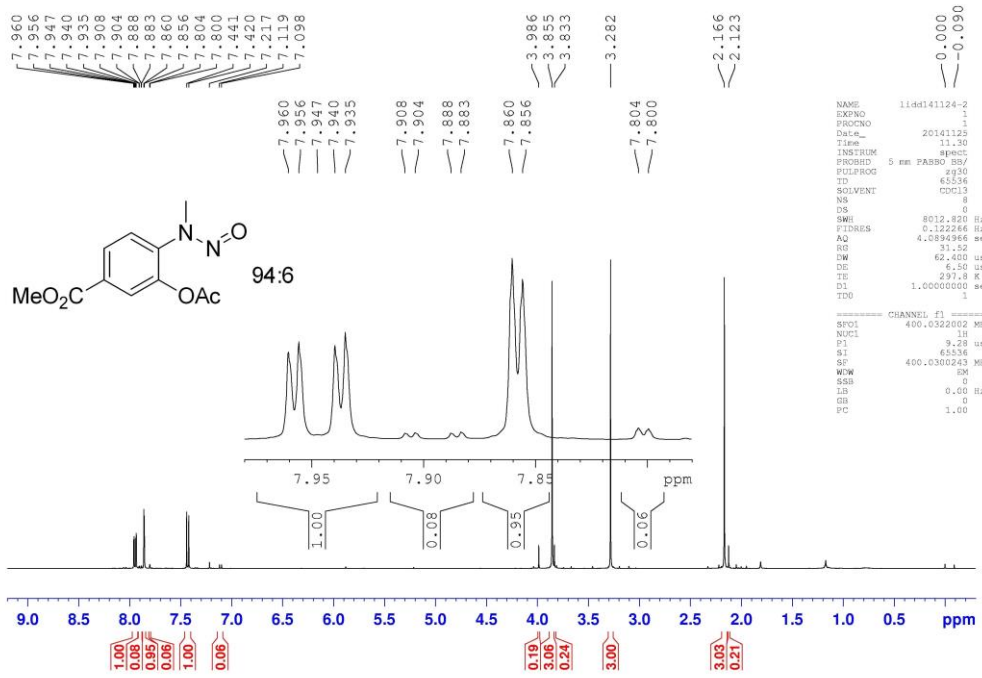

<sup>13</sup>C NMR (100 MHz, CDCl<sub>3</sub>) of compound 2j

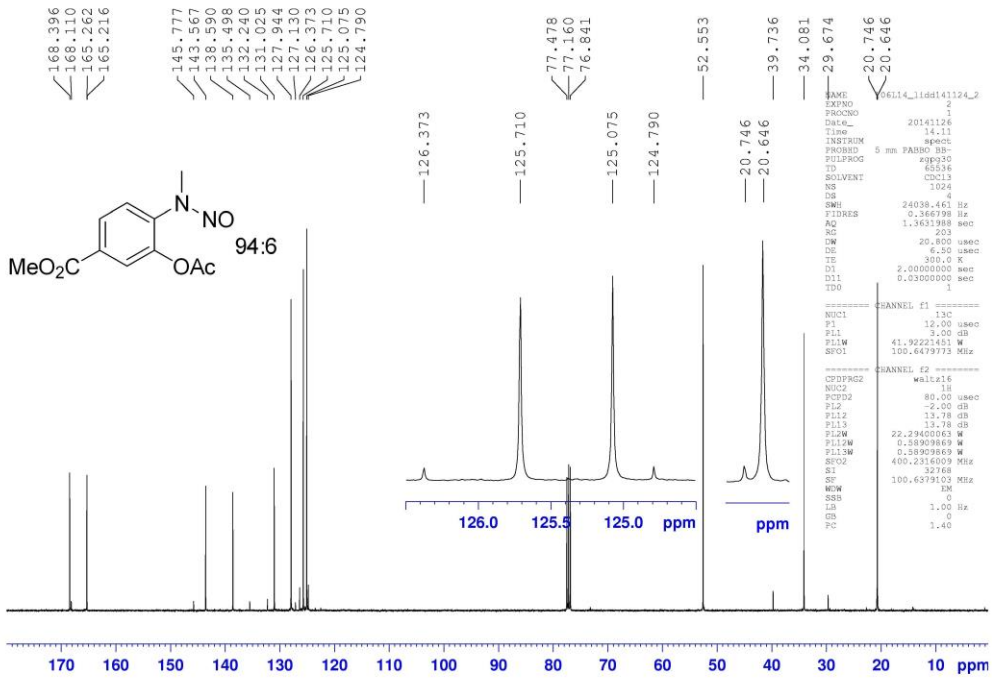

<sup>1</sup>H NMR (400 MHz, CDCl<sub>3</sub>) of compound 2k

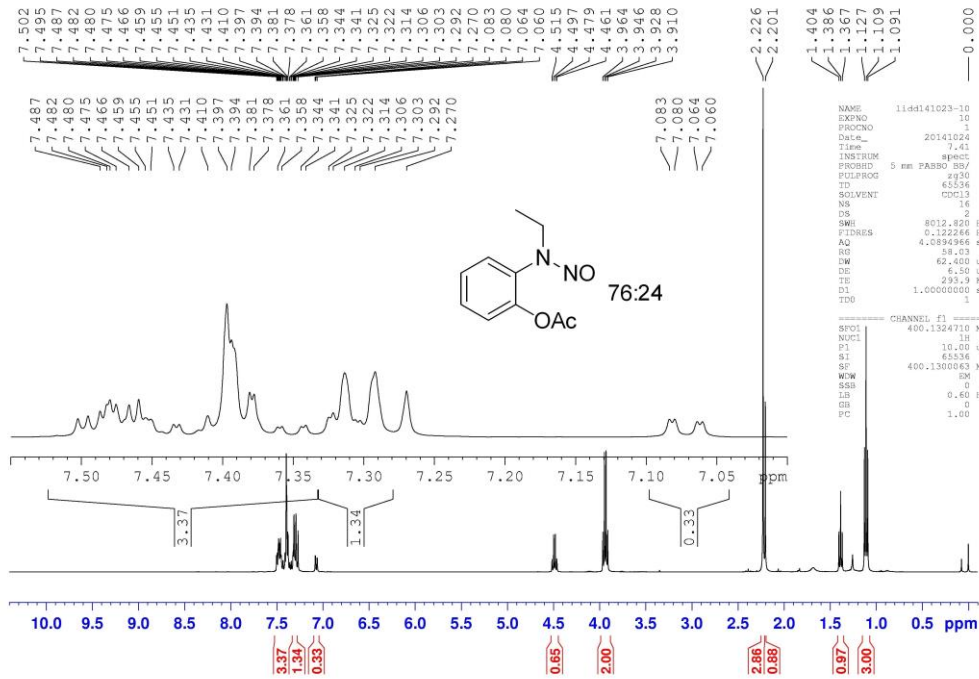

<sup>13</sup>C NMR (100 MHz, CDCl<sub>3</sub>) of compound 2k

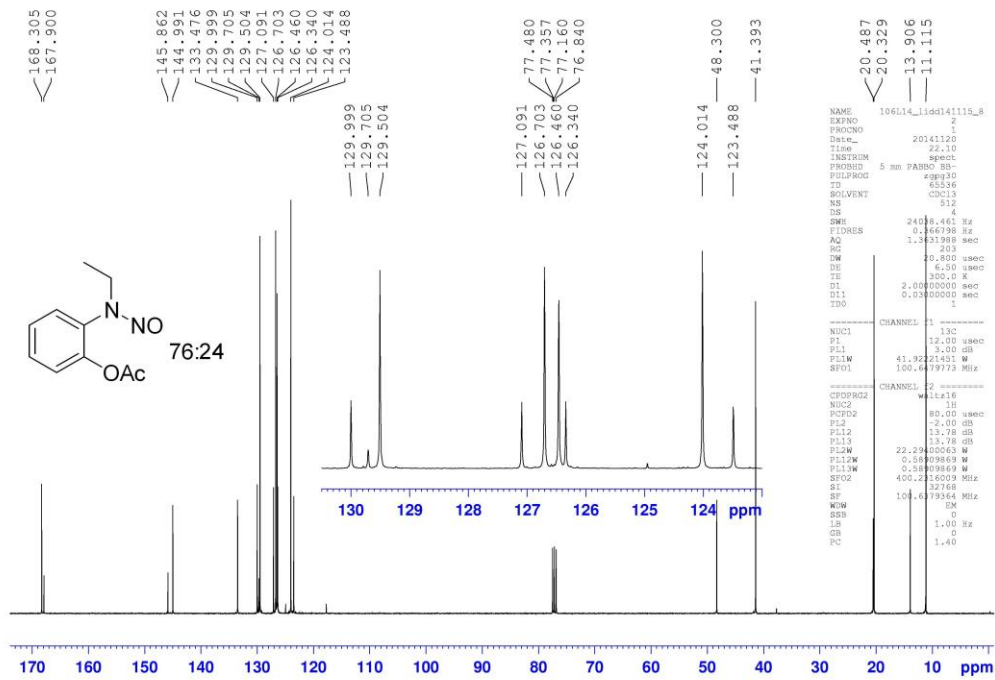

<sup>1</sup>H NMR (400 MHz, CDCl<sub>3</sub>) of compound 2l

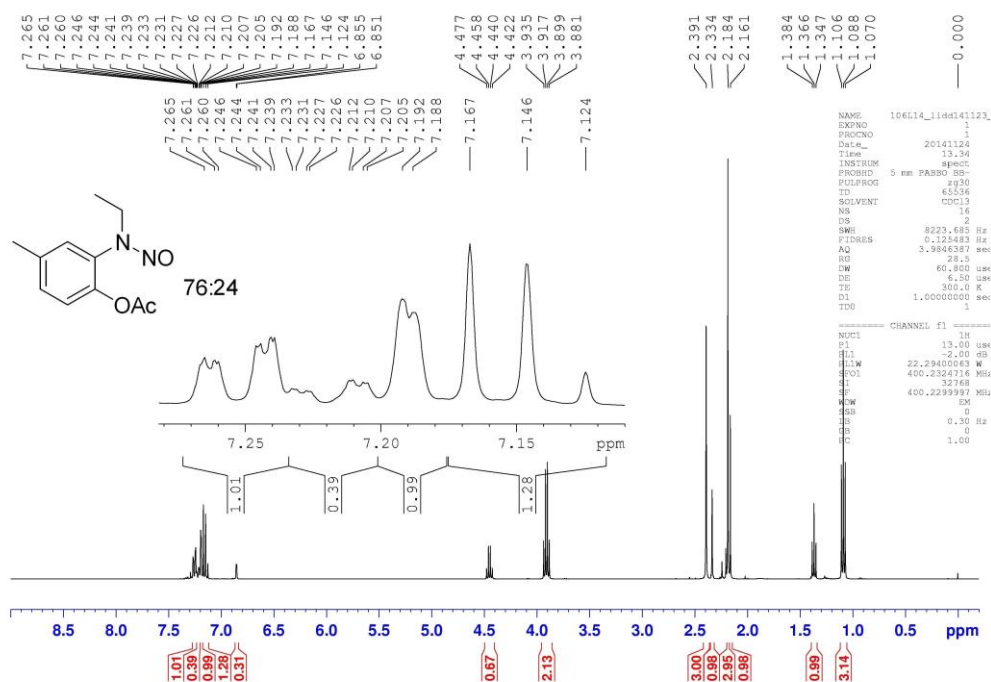

<sup>13</sup>C NMR (100 MHz, CDCl<sub>3</sub>) of compound 2l

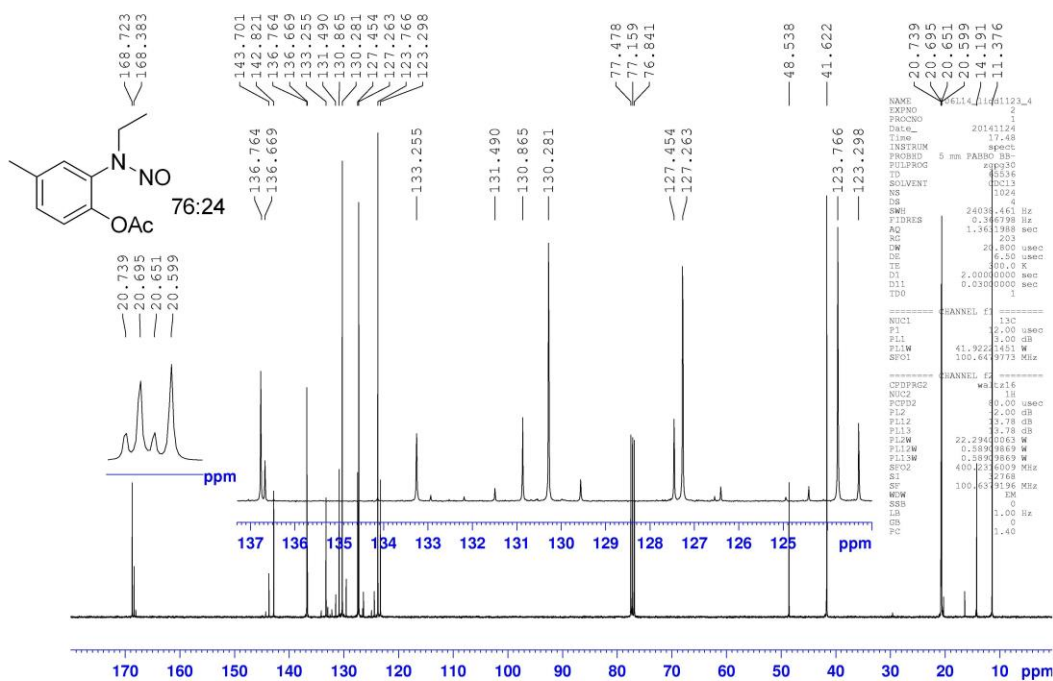

<sup>1</sup>H NMR (400 MHz, CDCl<sub>3</sub>) of compound 2m

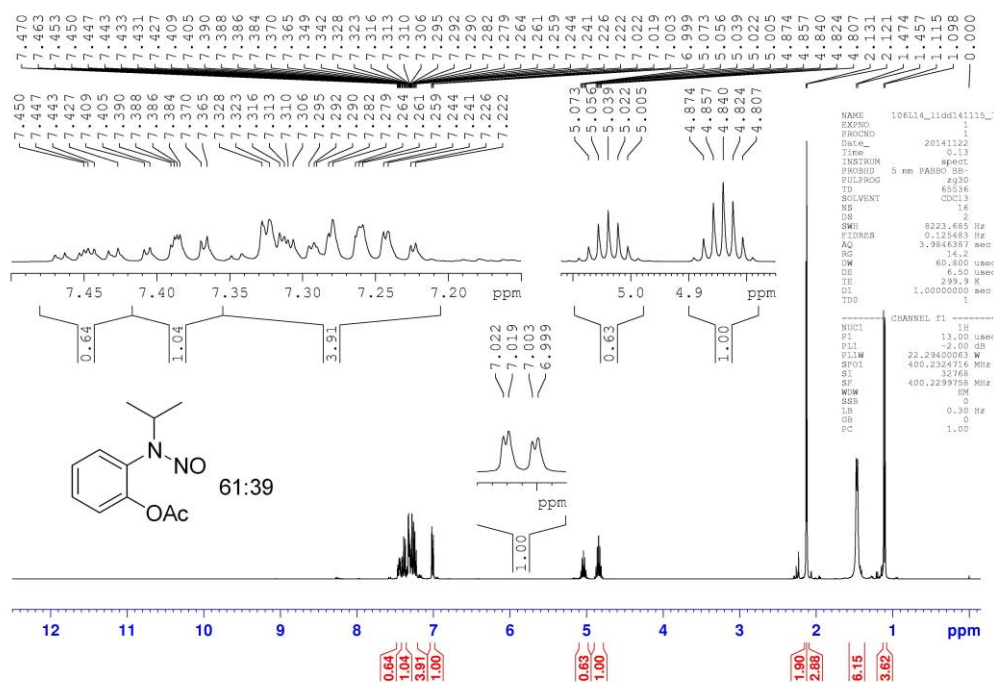

<sup>13</sup>C NMR (100 MHz, CDCl<sub>3</sub>) of compound 2m

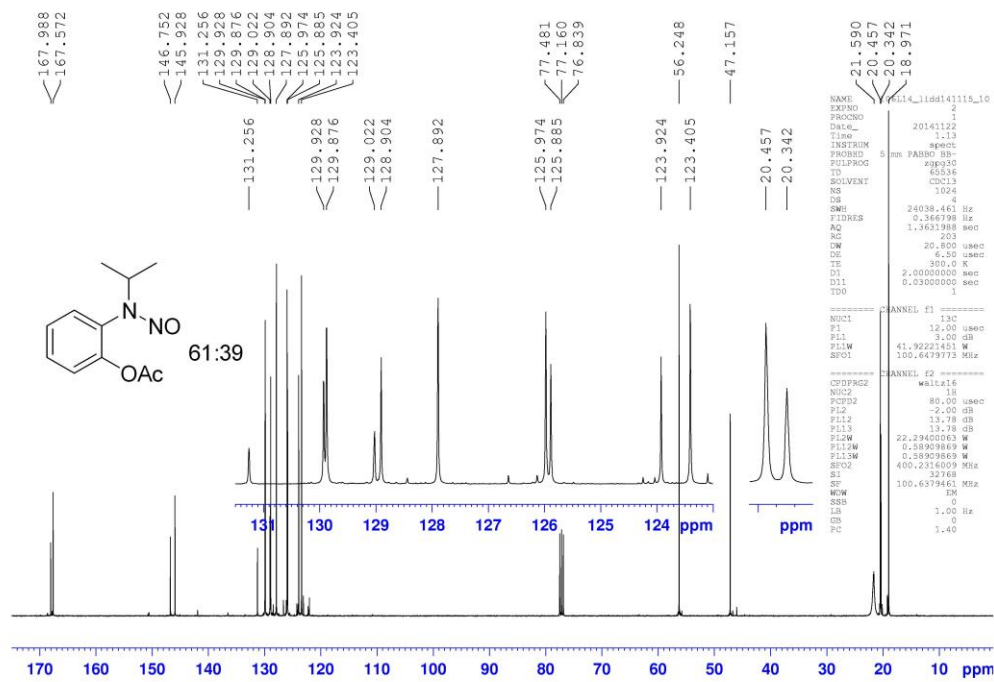



<sup>1</sup>H NMR (400 MHz, CDCl<sub>3</sub>) of compound 2n

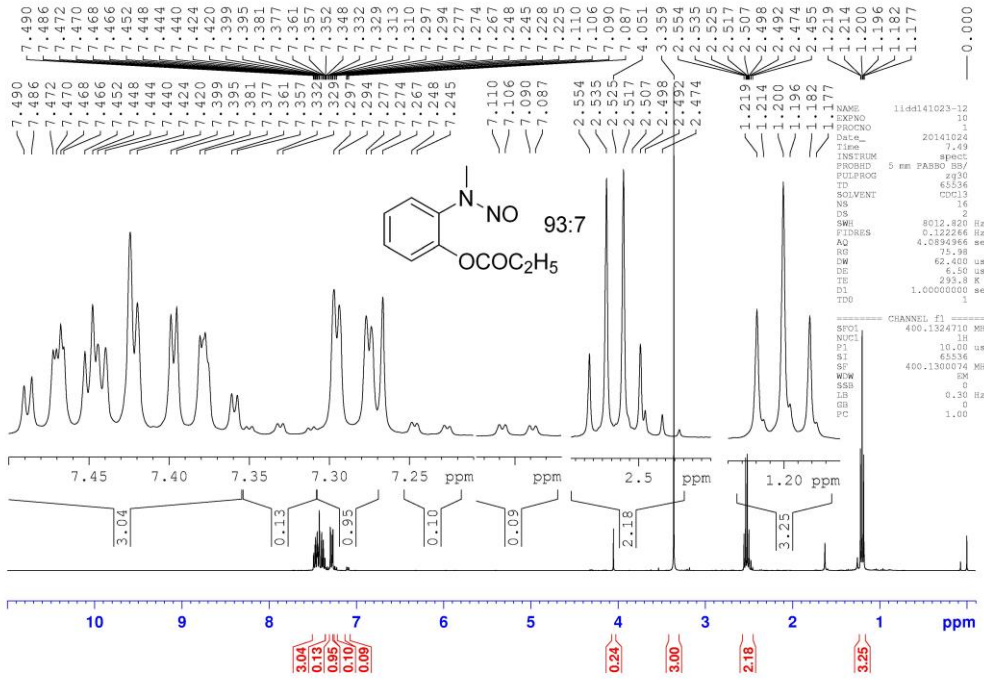

<sup>13</sup>C NMR (100 MHz, CDCl<sub>3</sub>) of compound 2n

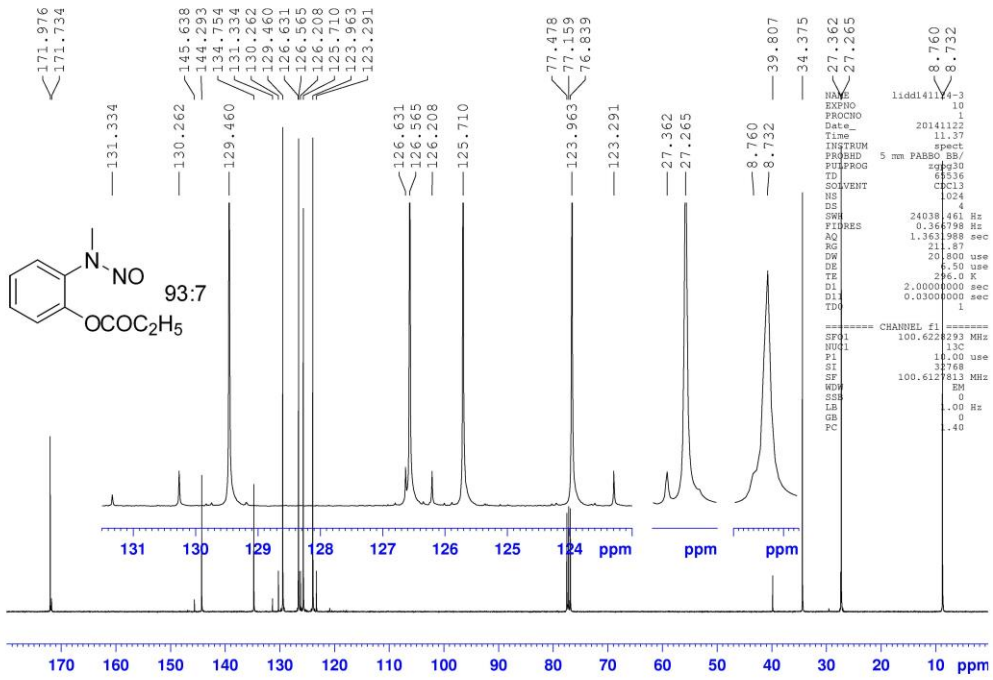

<sup>1</sup>H NMR (400 MHz, CDCl<sub>3</sub>) of compound 2o

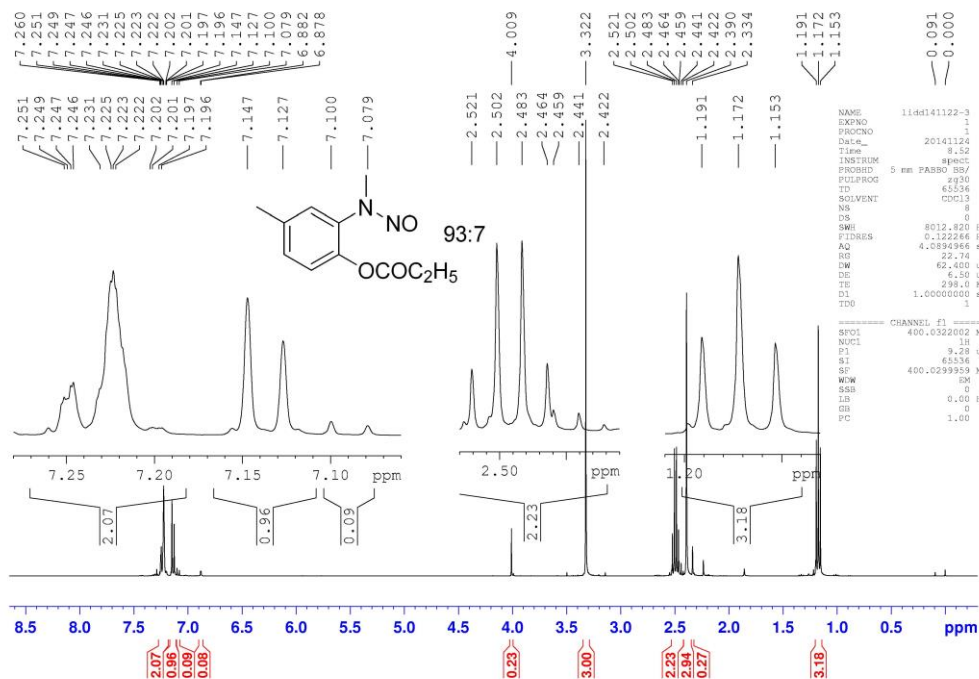

<sup>13</sup>C NMR (100 MHz, CDCl<sub>3</sub>) of compound 2o

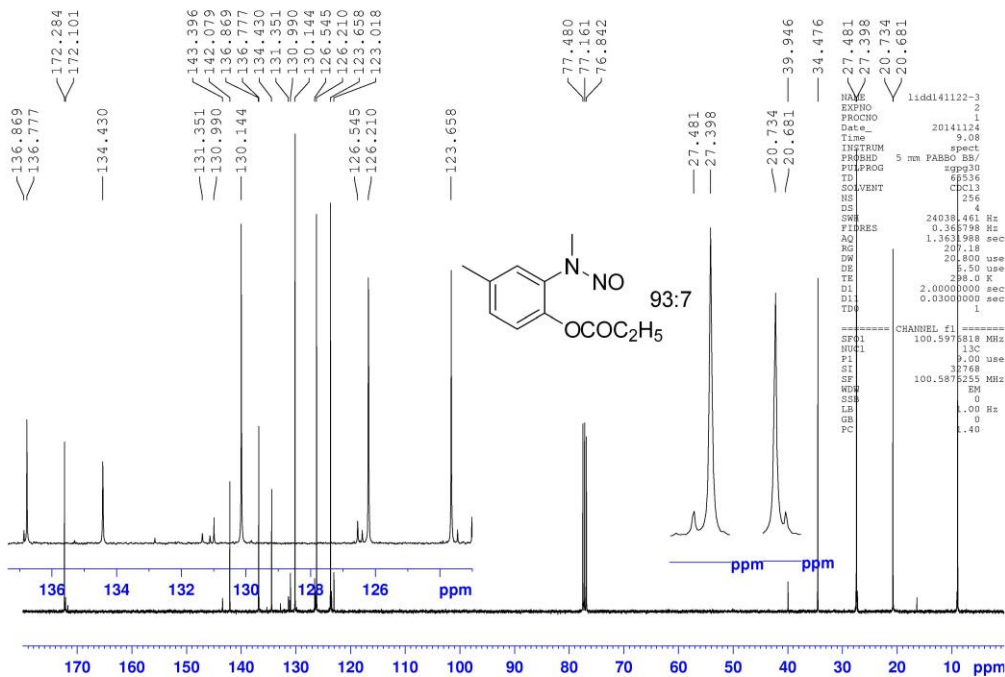

**<sup>1</sup>H NMR (400 MHz, CDCl<sub>3</sub>) of compound 2p**

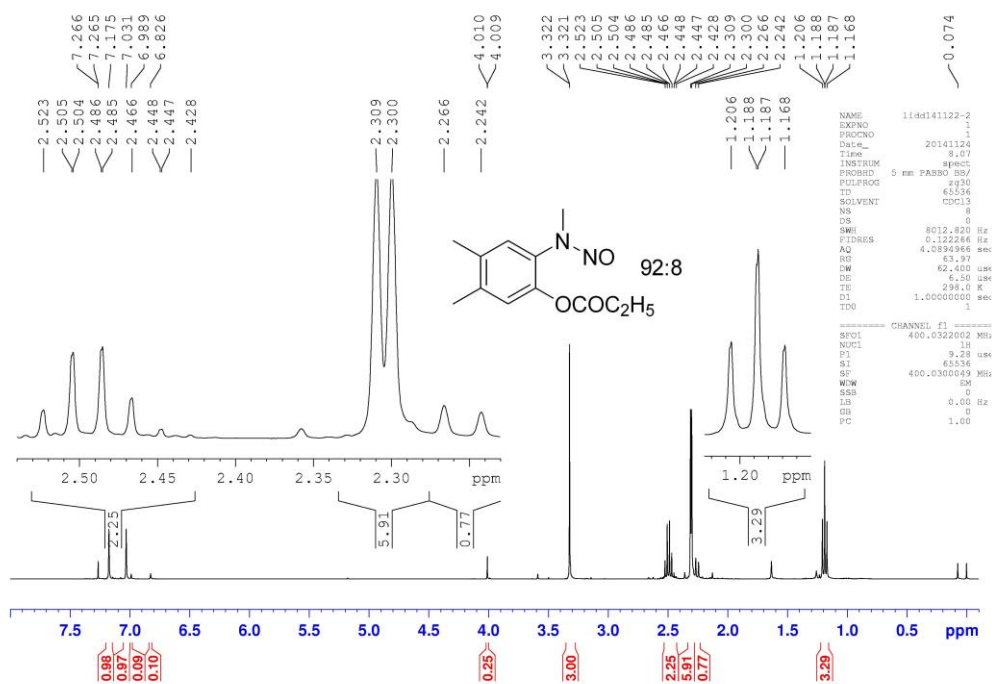

**<sup>13</sup>C NMR (100 MHz, CDCl<sub>3</sub>) of compound 2p**

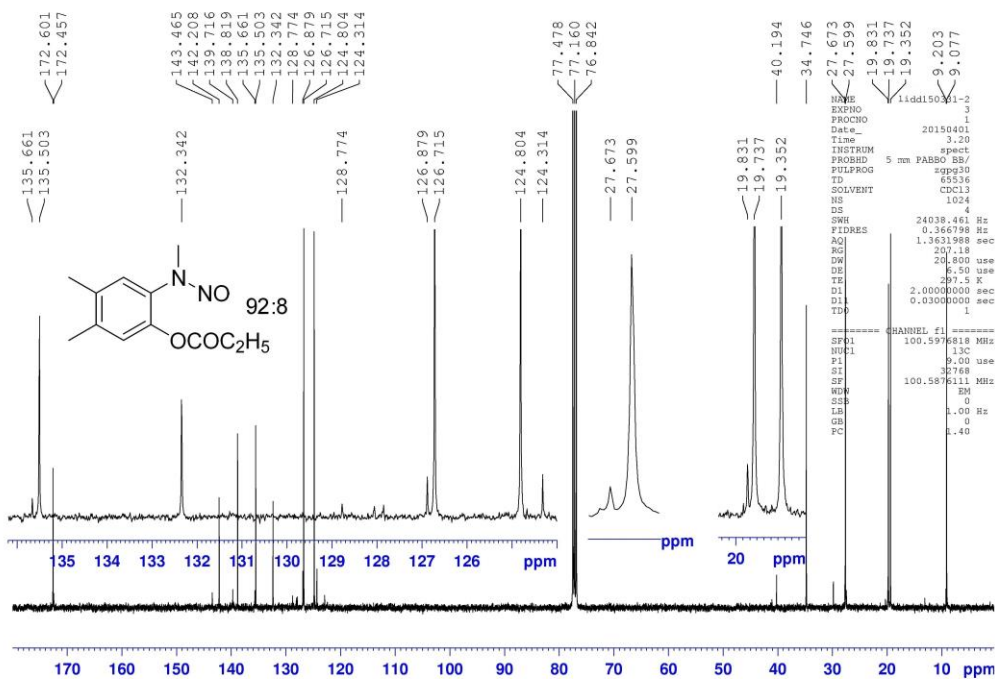

<sup>1</sup>H NMR (400 MHz, CDCl<sub>3</sub>) of compound 3a

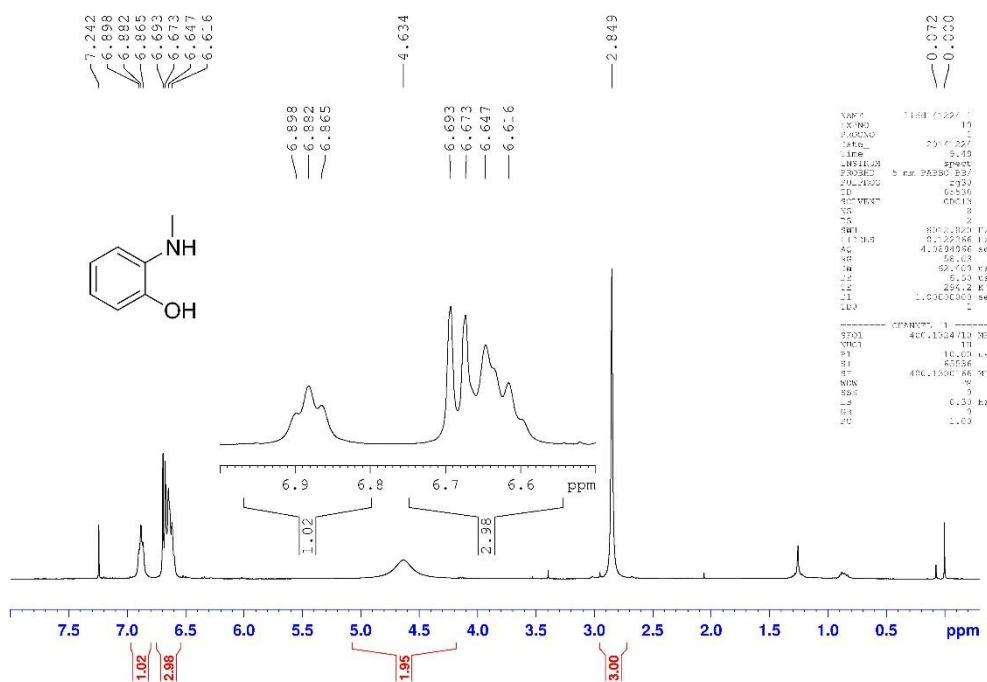

<sup>1</sup>H NMR (400 MHz, CDCl<sub>3</sub>) of compound 3b

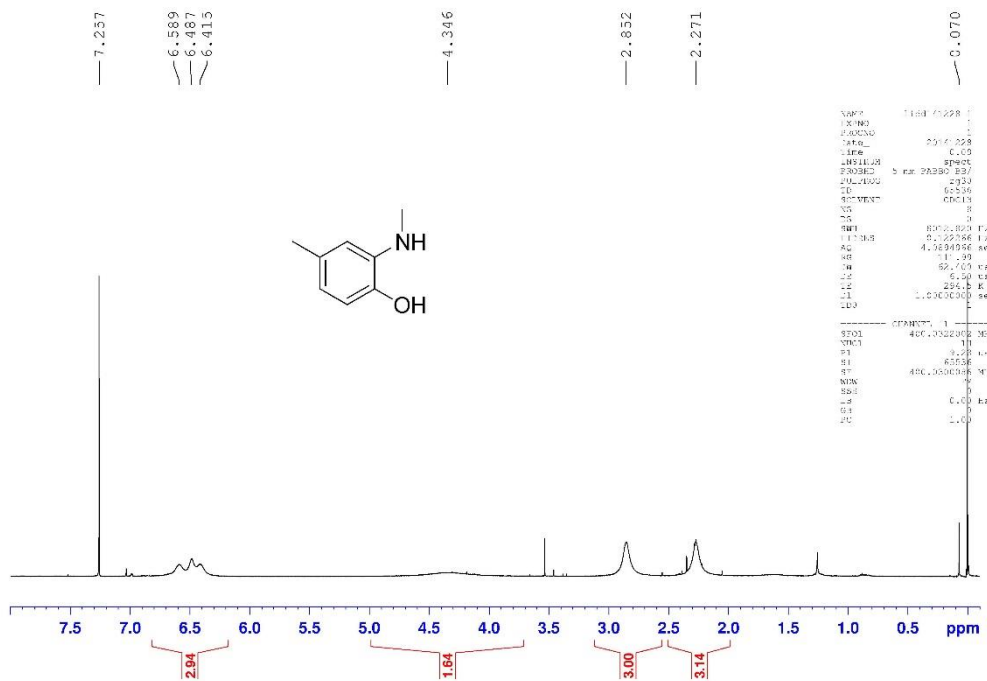

<sup>13</sup>C NMR (100 MHz, CDCl<sub>3</sub>) of compound 3b

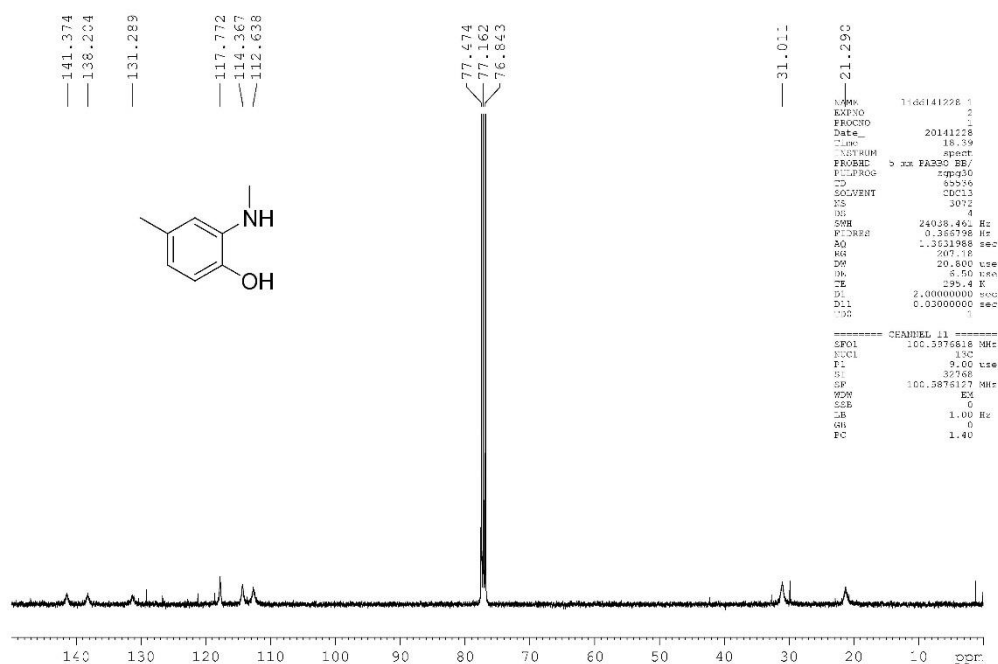

<sup>1</sup>H NMR (400 MHz, CDCl<sub>3</sub>) of compound 3g

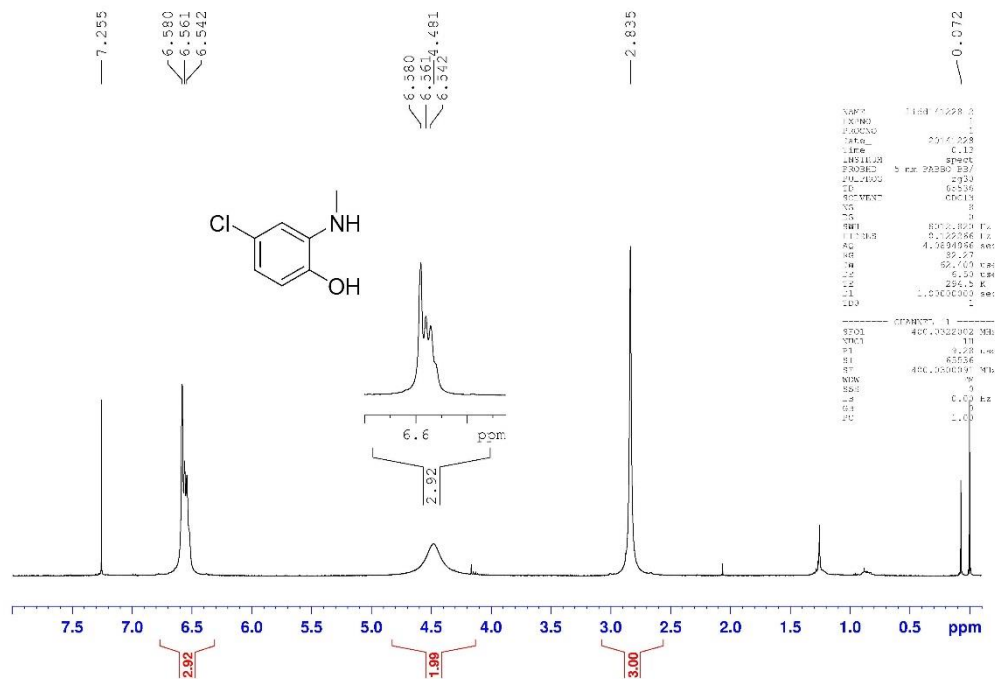

<sup>13</sup>C NMR (100 MHz, CDCl<sub>3</sub>) of compound 3g

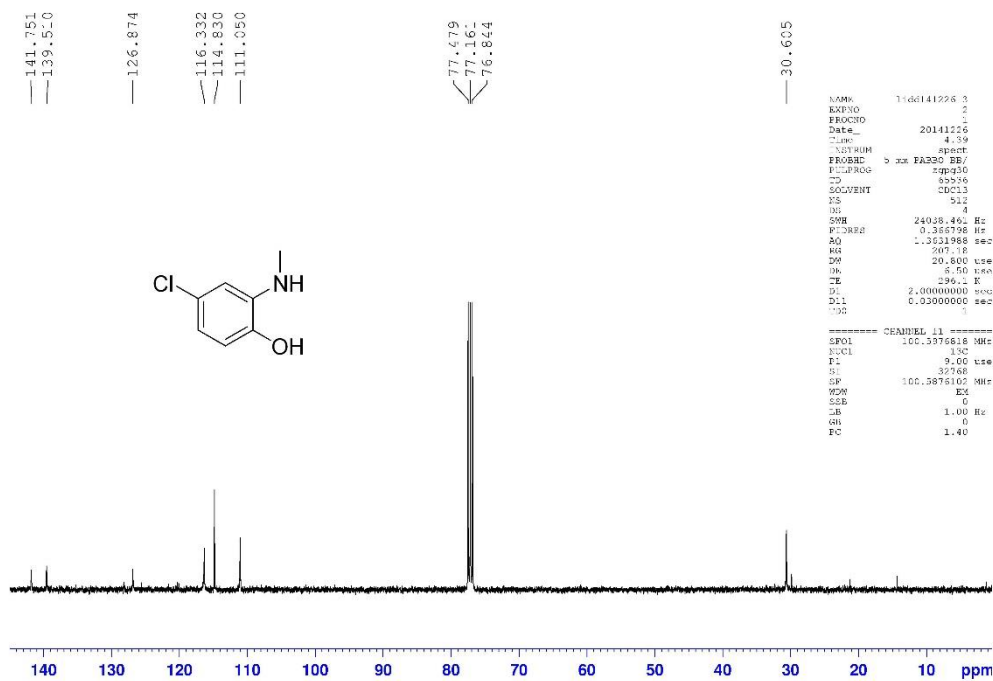

Supplement: c5ob00691k1.pdf [file c5ob00691k1.pdf]
